# Supplementary material
Source: HighWire-hosted journal article supplement (https://www.cmaj.ca/content/suppl/2002/04/04/164.3.323)
Supplement: 0323a.pdf [file 0323a.pdf]

The 1 minute

'PADDINGTON ALCOHOL TEST'  
(PAT)

N.B. 'page 3' A&E card

Circle number(s) - max 3 - for specific trigger(s); consider for ALL the **TOP 10** (include = i.):-

1. FALL (i. trip)

4. ASSAULT (i. involved)

7. PSYCHIATRIC (i. o'dose)

2. COLLAPSE (i. fits)

5. NON-SPECIFIC G.I.

8. CARDIAC (i. palpitations )

10. REPEAT Attender

3. HEAD INJURY (i. facial)

6. "UNWELL"

9. SELF-NEGLECT

Other (specify):- .....

DATE:

PATIENT IDENTIFICATION STICKER:

After Dealing with patient's 'agenda,' i.e. patient's reason for attendance:-

1.

"Quite a number of people have times when they drink more than usual; what is the most you will drink in any one day?" (Units, 8 gms alc., for pub measures in brackets; home measures often x3!)

Beer/lager/cider

\_\_\_ Pints (2)

\_\_\_ Cans (1.5)

total Units/day

Strong Beer/lager/cider

\_\_\_ Pints (5)

\_\_\_ Cans (4)

= \_\_\_\_\_

Wine

\_\_\_ Glasses (1.5)

\_\_\_ Bottles (9)

Fortified Wine (Sherry, Martini)

\_\_\_ Glasses (1)

\_\_\_ Bottles (12)

Spirits (Gin, Whisky, Vodka)

\_\_\_ Singles (1)

\_\_\_ Bottles (30)

2.

If this is more than 8 units/day for a man, or 6 units/day for a woman, does this happen

Circle

: Once a week or more?

=

YES: PAT +ve

(every day: ? Pabrinex )

or

: Less frequent ?

=

? PAT - neg

(?, as trumped by Quest. 3)

3.

'Do you feel your current attendance in A&E is related to alcohol?

YES(PAT+ve) / NO

If **PAT +ve**: 'Would you like to see our Health Worker?' **YES / NO**

If **YES**: give Alcohol Advice Card with appointment for next Review Clinic + book appt.

If **NO**: 1. Still give patient **Alcohol Advice Card** - patient may **change** mind later and return.  
2. Still complete **PAT**; place in notes for **reinforcement** if patient reattends.  
3. Still mark **A&E notes**, p.3: PAT '**POS**', Referred AHW '**NO**', to **alert** staff.  
4. Still inform **GP** in A&E discharge letter: no.11 letter if alcohol **main** problem.

If to be **admitted**, note in AHW book & state ward if known.....

SIGNATURE:

NAME STAMP:

PAT 2000
